# Supplementary material
Source: Springer Nature journal article supplement (https://www.springermedizin.de/resource/supplementary/13054_2012_1682_MOESM3_ESM.pdf/9711252)

## A. Non-diabetics

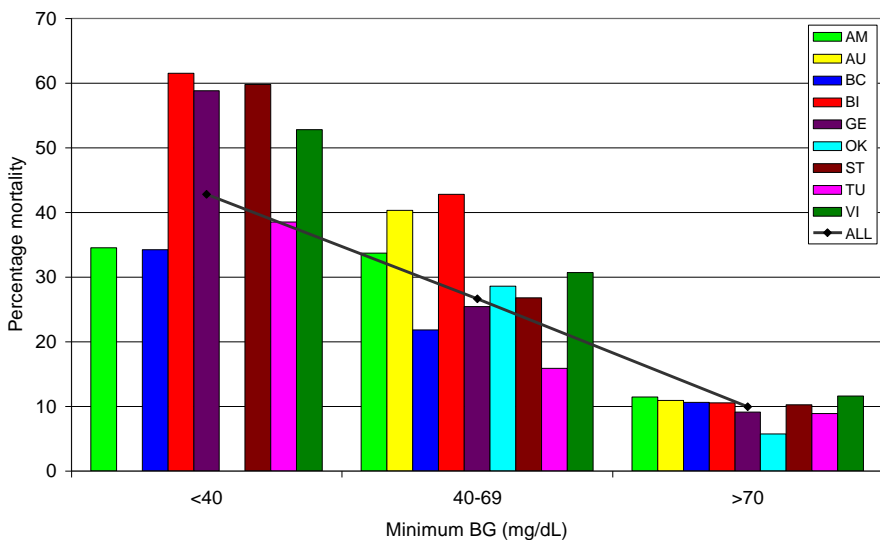

## B. Diabetics

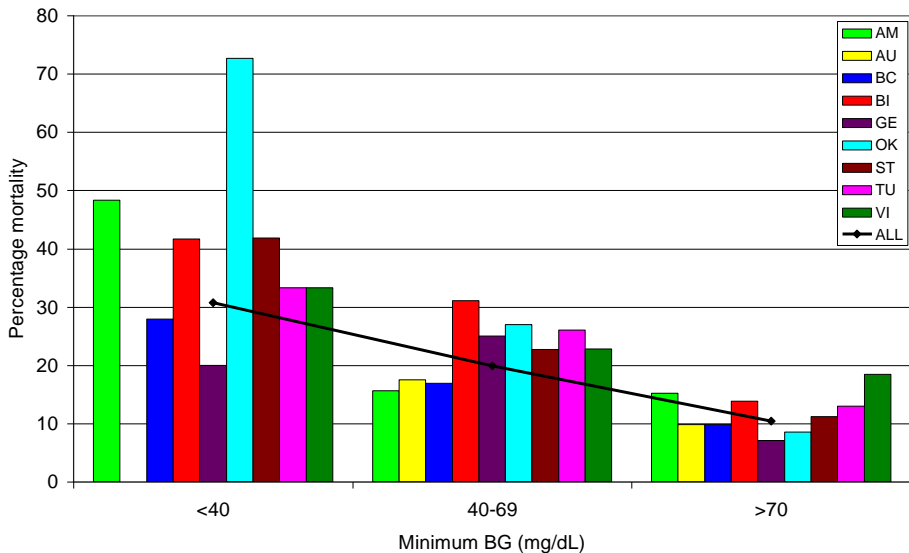

Supplement: MOESM3 [file 9711252]
